# Supplementary material for: Association between the atherogenic index of plasma and new-onset non-alcoholic fatty liver disease in non-obese participants
Source: PubMed Central journal article supplement (PMC9433643; doi:10.3389/fendo.2022.969783), 2022-08-18
Supplement: Image_1.pdf [file Image_1.pdf]

**Supplemental Figure 1.** The distribution of AIP levels in different BMI groups.

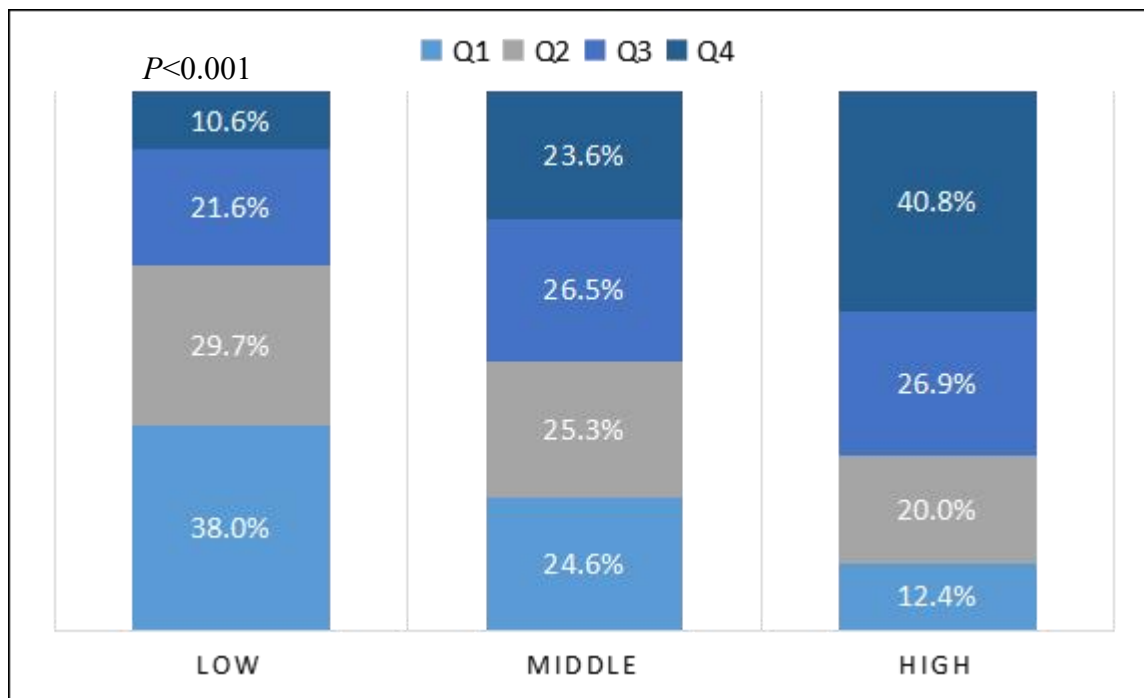

LOW: BMI  $< 20.4$  ; MIDDLE: BMI  $\geq 20.4$  to  $\leq 22.5$  ;HIGH: BMI  $\geq 22.5$
